# Supplementary material
Source: publisher site journal article supplement (https://www.dovepress.com/get_supplementary_file.php?f=493376.docx)
Supplement: Supplementary file 1 [file get_supplementary_file.php]

**
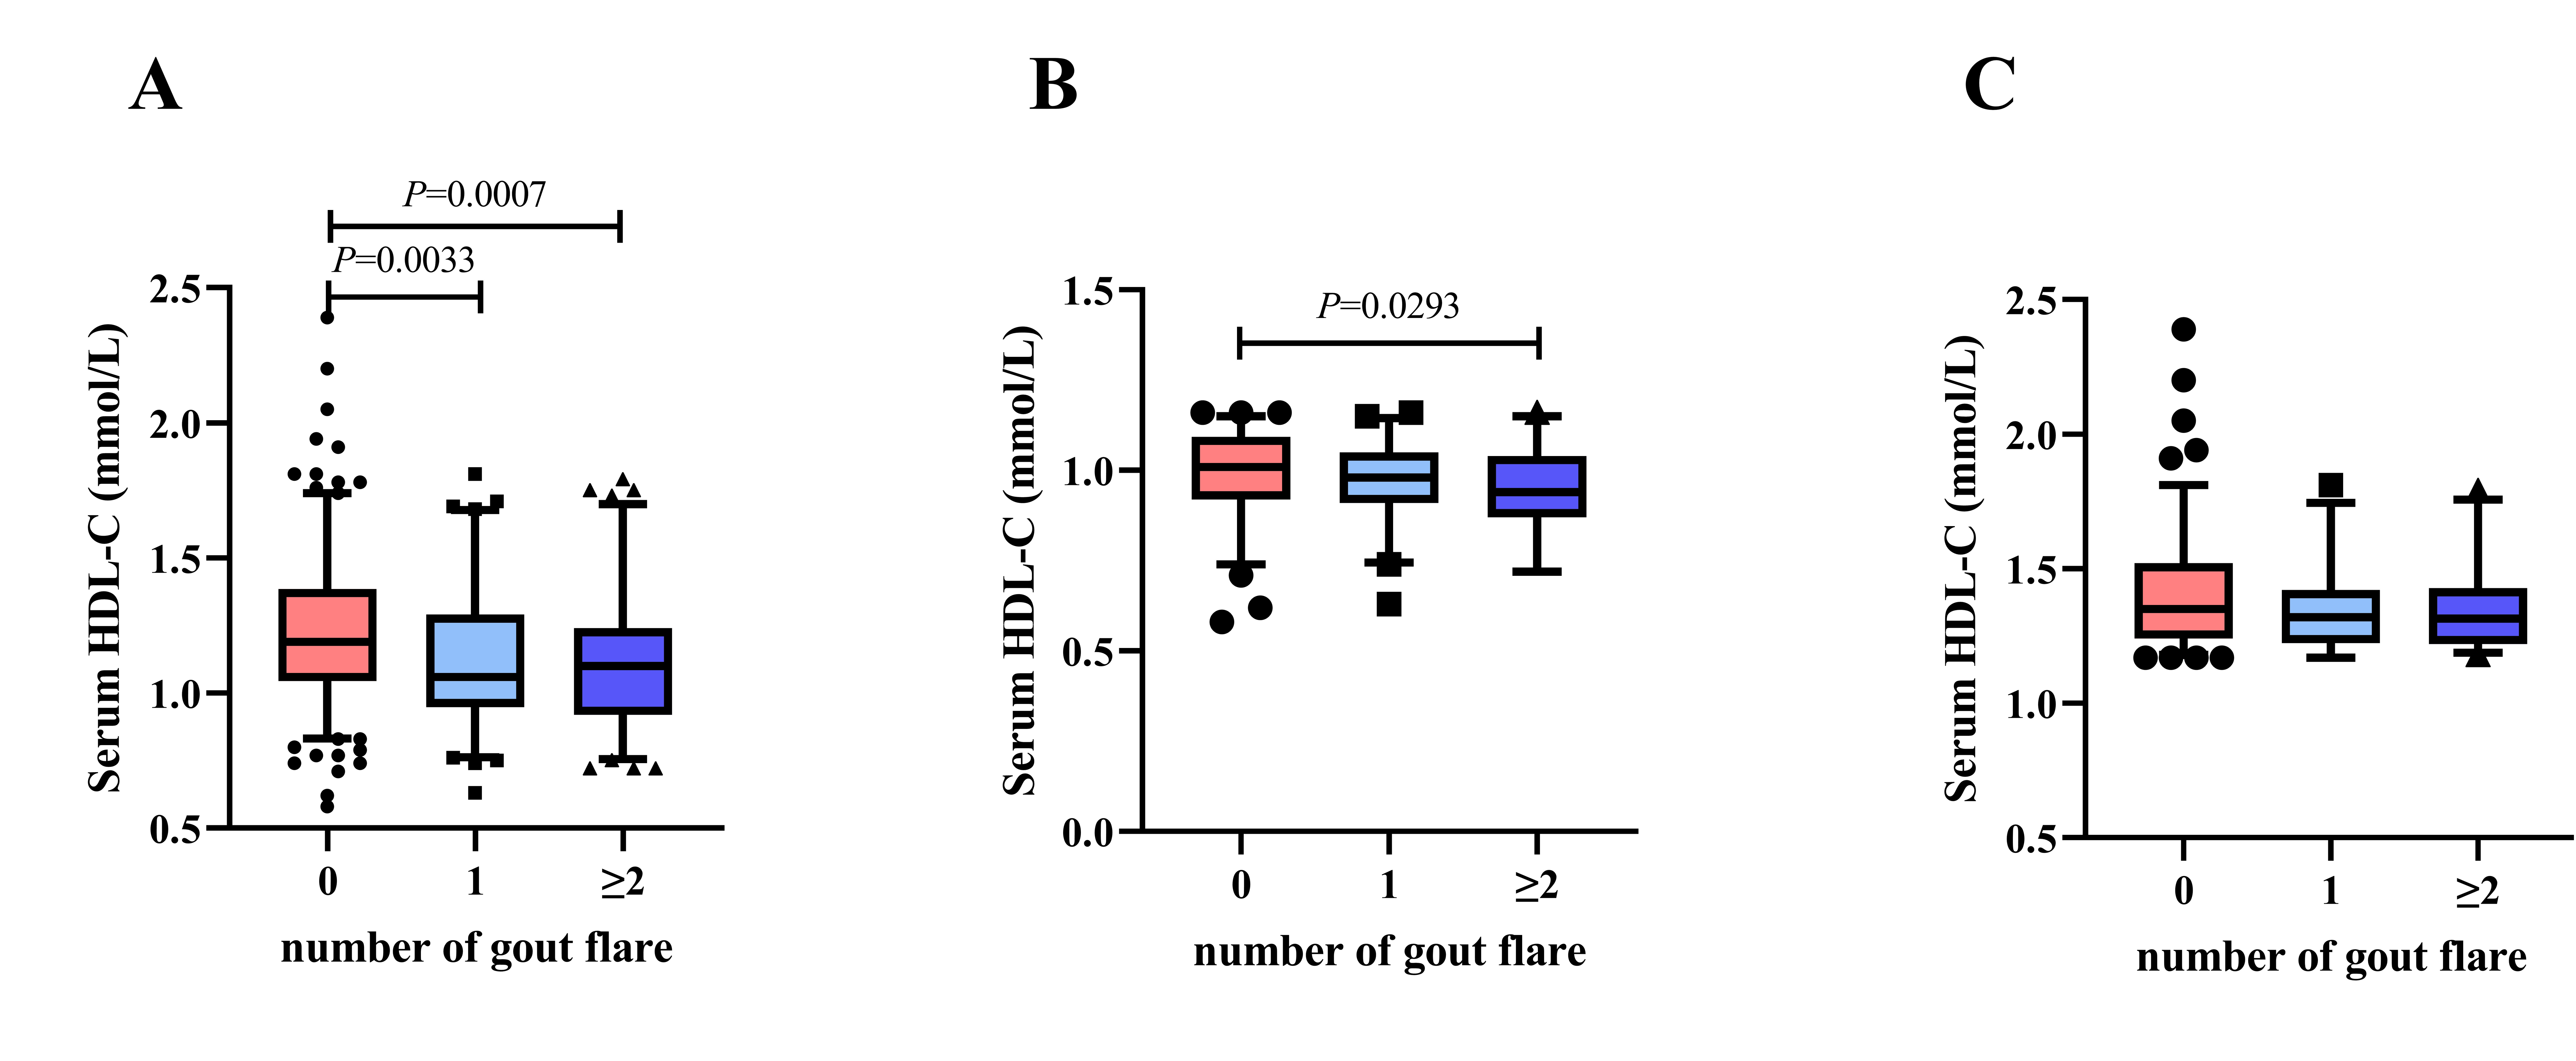
Supplementary Figure 1. Serum HDL of patients with different gout flares during the whole follow-up. A.** Serum HDL-C of patients with 0, 1, ≥2 gout flares during 12 weeks follow-up in all participants. **B and C.** Serum HDL-C of patients with 0, 1, ≥2 gout flares during 12 weeks follow-up in low (B) and high (C) HDL-C group. HDL-C, high-density lipoprotein cholesterol.


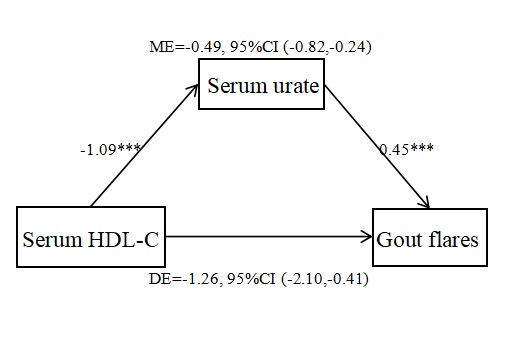


**Supplementary Figure 2. Serum urate mediation model of the relationship between serum HDL-C and gout flares.** ME: Mediation effect; DE: Direct effect; HDL-C, high-density lipoprotein cholesterol. *** means *P* < 0.001.

**Supplementary Table 1. Sensitivity analysis in the risk of gout flares.**

|  | **Risk of gout flares**  **(Model 1)** | | **Risk of gout flares**  **(Model 2)** | |
| --- | --- | --- | --- | --- |
|  | **HR (95% CI)** | ***P* value** | **HR (95% CI)** | ***P* value** |
| **Extreme 5% of HDL-C excluded** |  |  |  |  |
| HDL-C | 0.30 (0.15, 0.61) | 0.001 | 0.44 (0.21, 0.90) | 0.025 |
| **Serum urate > 10 mg/dL excluded** |  |  |  |  |
| HDL-C | 0.34 (0.17, 0.68) | 0.002 | 0.43 (0.20, 0.89) | 0.024 |
| **Age > 60 years excluded** |  |  |  |  |
| HDL-C | 0.34 (0.18, 0.64) | 0.001 | 0.45 (0.23, 0.87) | 0.018 |

Sensitivity analysis was conducted using cox regression analysis. Model 1 was a univariate analysis of HDL-Clevels. Model 2 was a backward stepwise regression adjusted for age, BMI, onset age, disease duration, positive family history, flared in the last year, recurrent flared in the last year, palpable tophus, ≥ 1 comorbidities, ULT drug, serum urate, blood glucose, triglyceride, total cholesterol, LDL-C, ALT, AST, eGFR and HDL-C.

**Supplementary Table 2. Frequency of adverse events during the follow-up.**

|  | **Low HDL-C**  **(n=203)** | **High HDL-C**  **(n=191)** | ***P* value** |
| --- | --- | --- | --- |
| **New onset AST level elevation** | 25 (12.3) | 12 (6.3) | 0.056 |
| 1–2 times elevation | 23 (11.3) | 12 (6.3) | 0.110 |
| 2–3 times elevation | 1 (0.5) | 0 (0) | 1.000 |
| >3 times elevation | 1 (0.5) | 0 (0) | 1.000 |
| **New onset ALT level elevation** | 85 (41.9) | 49 (25.7) | 0.001 |
| 1–2 times elevation | 69 (34.0) | 44 (23.0) | 0.019 |
| 2–3 times elevation | 12 (5.9) | 5 (2.6) | 0.138 |
| >3 times elevation | 4 (2.0) | 0 (0) | 0.124 |
| **eGFR <45 ml/minute/1.73 m2** | 0 (0) | 0 (0) | 1.000 |

New-onset elevation was defined aselevation above the normal upper limit during follow-up. HDL-C, high-density lipoprotein cholesterol. ALT, alanine aminotransferase; AST, aspartate aminotransferase; eGFR, estimated glomerular filtration rate.
